# Supplementary material for: Changes in gastric mucosal microbiota in gastric carcinogenesis: a systematic review protocol
Source: PubMed Central journal article supplement — BMJ Open. 2021 Mar 2;11(3):e045810. doi: 10.1136/bmjopen-2020-045810 (PMC7929888; doi:10.1136/bmjopen-2020-045810), 2021-03-02
Supplement: bmjopen-2020-045810.draft_revisions.pdf [file bmjopen-2020-045810.draft_revisions.pdf]

# BMJ Open

BMJ Open is committed to open peer review. As part of this commitment we make the peer review history of every article we publish publicly available.

When an article is published we post the peer reviewers' comments and the authors' responses online. We also post the versions of the paper that were used during peer review. These are the versions that the peer review comments apply to.

The versions of the paper that follow are the versions that were submitted during the peer review process. They are not the versions of record or the final published versions. They should not be cited or distributed as the published version of this manuscript.

BMJ Open is an open access journal and the full, final, typeset and author-corrected version of record of the manuscript is available on our site with no access controls, subscription charges or pay-per-view fees (<http://bmjopen.bmj.com>).

If you have any questions on BMJ Open's open peer review process please email [info.bmjopen@bmj.com](mailto:info.bmjopen@bmj.com)

# BMJ Open

## The changes in the composition of gastric microbiota in gastric carcinogenesis: a systematic review protocol

|                               |                                                                                                                                                                                                                                                                                                                                                                                                                                                                                        |
|-------------------------------|----------------------------------------------------------------------------------------------------------------------------------------------------------------------------------------------------------------------------------------------------------------------------------------------------------------------------------------------------------------------------------------------------------------------------------------------------------------------------------------|
| Journal:                      | <i>BMJ Open</i>                                                                                                                                                                                                                                                                                                                                                                                                                                                                        |
| Manuscript ID                 | bmjopen-2020-045810                                                                                                                                                                                                                                                                                                                                                                                                                                                                    |
| Article Type:                 | Protocol                                                                                                                                                                                                                                                                                                                                                                                                                                                                               |
| Date Submitted by the Author: | 12-Oct-2020                                                                                                                                                                                                                                                                                                                                                                                                                                                                            |
| Complete List of Authors:     | Ji, Ruoyu; Peking Union Medical College Hospital, Department of Gastroenterology<br>Zhao, Xinyu; Capital Medical University Affiliated Beijing Friendship Hospital, Department of Clinical Epidemiology and EBM<br>Cao, Xinyuan; Peking Union Medical College Hospital, Department of Gastroenterology<br>Zhang, Yizhen; Peking Union Medical College Hospital, Department of Gastroenterology<br>Yang, Yingyun; Peking Union Medical College Hospital, Department of Gastroenterology |
| Keywords:                     | BACTERIOLOGY, GASTROENTEROLOGY, Gastrointestinal tumours < ONCOLOGY                                                                                                                                                                                                                                                                                                                                                                                                                    |
|                               |                                                                                                                                                                                                                                                                                                                                                                                                                                                                                        |

SCHOLARONE™  
Manuscripts

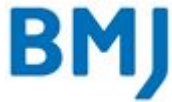

I, the Submitting Author has the right to grant and does grant on behalf of all authors of the Work (as defined in the below author licence), an exclusive licence and/or a non-exclusive licence for contributions from authors who are: i) UK Crown employees; ii) where BMJ has agreed a CC-BY licence shall apply, and/or iii) in accordance with the terms applicable for US Federal Government officers or employees acting as part of their official duties; on a worldwide, perpetual, irrevocable, royalty-free basis to BMJ Publishing Group Ltd ("BMJ") its licensees and where the relevant Journal is co-owned by BMJ to the co-owners of the Journal, to publish the Work in this journal and any other BMJ products and to exploit all rights, as set out in our [licence](#).

The Submitting Author accepts and understands that any supply made under these terms is made by BMJ to the Submitting Author unless you are acting as an employee on behalf of your employer or a postgraduate student of an affiliated institution which is paying any applicable article publishing charge ("APC") for Open Access articles. Where the Submitting Author wishes to make the Work available on an Open Access basis (and intends to pay the relevant APC), the terms of reuse of such Open Access shall be governed by a Creative Commons licence – details of these licences and which [Creative Commons](#) licence will apply to this Work are set out in our licence referred to above.

Other than as permitted in any relevant BMJ Author's Self Archiving Policies, I confirm this Work has not been accepted for publication elsewhere, is not being considered for publication elsewhere and does not duplicate material already published. I confirm all authors consent to publication of this Work and authorise the granting of this licence.

**TITLE PAGE****The changes in the composition of gastric microbiota in gastric carcinogenesis: a systematic review protocol****Ruoyu Ji<sup>1</sup>, Xinyu Zhao<sup>2</sup>, Xinyuan Cao<sup>1</sup>, Yizhen Zhang<sup>1</sup>, Yingyun Yang<sup>1\*</sup>**

<sup>1</sup> Department of Gastroenterology, Peking Union Medical College Hospital (PUMCH), Chinese Academy of Medical Sciences & Peking Union Medical College (CAMS & PUMC), Beijing, 100730, China.

<sup>2</sup> Department of Clinical Epidemiology and EBM, Beijing Friendship Hospital, Capital Medical University; National Clinical Research Center for Digestive Diseases, Beijing 100050, China.

Ruoyu Ji and Xinyu Zhao contributed equally. Ruoyu Ji and Xinyu Zhao are joint first authors.

**\*Correspondence:**

Dr Yingyun Yang, Department of Gastroenterology, Peking Union Medical College Hospital (PUMCH), Chinese Academy of Medical Sciences & Peking Union Medical College (CAMS & PUMC), Beijing, 100730, China. E-mail: yangyinyun@pumch.cn; Phone: 86-18510031805.

**Keywords:** Microbiota; Gastric cancer; Systematic review**Word Count:** 1851

## ABSTRACT

**Introduction:** The human stomach is a complex and diverse microbial ecosystem. Consecutive alternation of gastric microbiota composition occurs during gastric carcinogenesis, while the changing pattern during this process remains controversial across studies. We aim to evaluate the changes in the diversity of gastric microbiota and the relative abundance of bacterial at the phylum and genus levels between gastric cancer and non-cancer patients.

**Methods and analysis:** This systematic review will be performed based on PubMed, Embase, and Cochrane databases, as well as conference proceedings and relevant references of review articles. We will include human observational studies that report either the relative abundance of bacteria at the phylum or genus levels, or at least one of the Alpha diversity indexes respectively and clearly in both gastric cancer and non-cancer groups. Selection of studies and data extraction will be performed by two researchers independently, and disagreements will be resolved by the whole team. Risk of bias will be evaluated using Newcastle Ottawa Scale (NOS). We will conduct quantitative analyses using a random-effects model, and review results will be presented as mean differences.

**Ethics and Dissemination:** Ethical approval for this systematic review is not required, as the study is based exclusively on published documents and will not include any individual data. The results of this study are expected to be disseminated through peer-reviewed journals or conference abstracts.

**PROSPERO registration number:** CRD42020206973

### Strengths and limitations of this study

1 This systematic review will comprehensively identify the changes in the gastric

1  
2  
3  
4 microbiota composition during gastric carcinogenesis, which is an important but  
5 controversial clinical issue.

6  
7 2 Limited statistical power in published articles will be resolved through quantitative  
8 synthesis.

9  
10  
11 3 Selection of articles, data extraction and evaluation of risk of bias will be performed  
12 by two researchers independently with disagreements resolved by the whole team,  
13 minimizing the potential personal biases.

14  
15  
16  
17 4 The majority of studies concerning this issue are observational studies, we anticipate  
18 a large heterogeneity across included studies.  
19  
20  
21  
22  
23  
24  
25  
26  
27  
28  
29  
30  
31  
32  
33  
34  
35  
36  
37  
38  
39  
40  
41  
42  
43  
44  
45  
46  
47  
48  
49  
50  
51  
52  
53  
54  
55  
56  
57  
58  
59  
60

## MAIN TEXT

### Introduction

The human gastrointestinal tract is a complex and diverse microbial ecosystem which contains numerous microorganisms. These microbes interact with each other, participating in a variety of physiological processes as well as disease occurrence.<sup>[1]</sup> Stomach has long been considered as a sterile environment due to high gastric acid production and several antimicrobial mechanisms, until *Helicobacter pylori* (*H. pylori*) was first discovered in 1983. Recently, with the development of high throughput sequencing technology, a unique and complex composition of gastric microbiota was step-by-step characterized.<sup>[2]</sup>

Gastric cancer, as the fifth most common diagnosed malignancy (1,033,701 new cases in 2018) and the third cause of cancer death (782,685 deaths in 2018), became a considerable health burden worldwide, especially in regions with a high incidence of this disease, such as China and other Asian countries.<sup>[3, 4]</sup> The recognized Correa's model of gastric carcinogenesis speculated that intestinal-type gastric cancer developed through the stages of superficial gastritis, atrophic gastritis, intestinal metaplasia, intraepithelial neoplasia and eventually gastric cancer.<sup>[5]</sup> A series of studies have confirmed that *H. Pylori* was involved in this process and was considered as a major risk factor for gastric cancer.<sup>[6]</sup> However, only about 1% of patients with *H.Pylori*-induced chronic gastritis will ultimately develop cancer,<sup>[7]</sup> and eradication of *H.Pylori* could not completely prevent carcinogenesis.<sup>[8, 9]</sup> Thus, more recent studies have explored the role of non-*H.Pylori* bacteria in the development of gastric cancer, and the shift in the composition of gastric microbiota rather than certain bacteria was considered to play an important role in gastric carcinogenesis.<sup>[10, 11]</sup>

Compared with cancer-free stomach, significant differences in the composition of gastric microbiota in gastric cancer has been discussed in a range of published articles, with microbial diversity changed and relative abundance increased in some microorganisms while decreased in others.<sup>[10, 12]</sup> Identifying the changing pattern of gastric microbiota may contribute to the early diagnosis and microbial treatment for

1  
2  
3  
4 gastric cancer. However, the composition of gastric microbiota is dynamic, as it can be  
5 impacted by several factors and differs geographically and ethnically.<sup>[13, 14]</sup>  
6  
7 Discrepancies were found across present studies regarding the changing pattern of  
8 gastric microbiota. In addition, the small sample sizes and heterogeneity nature of  
9 published studies compromised the validity of their results. Therefore, it is meaningful  
10 to perform a systematic review and meta-analysis to evaluate and to provide stronger  
11 evidence for the changes of gastric microbiota between gastric cancer and non-cancer  
12 patients.  
13  
14  
15  
16  
17  
18  
19  
20

## 21 **Objectives**

22  
23 The purpose of this research protocol is to outline a systematic review and meta-  
24 analysis which evaluates the changes in the diversity of gastric microbiota and the  
25 relative abundance of bacterial at the phylum and genus levels between gastric cancer  
26 and non-cancer patients.  
27  
28  
29  
30  
31  
32

## 33 **Methods and Analysis**

34  
35 Registration of this protocol has been completed on the PROSPERO (International  
36 Prospective Register of Systematic Reviews) website with the registration number  
37 CRD42020206973. This protocol adheres to the guideline of the Preferred Reporting  
38 Items for Systematic Review and Meta-Analysis Protocols (PRISMA-P) statement.<sup>[15]</sup>  
39 Reporting items are detailed in PRISMA-P checklists (supplementary appendix 1).  
40  
41  
42  
43  
44  
45  
46

## 47 **Inclusion criteria**

### 48 Types of Studies

49  
50 This systematic review will include observational (cross-sectional, case-control,  
51 prospective and retrospective cohorts) human studies. Other types of human studies or  
52 animal studies will be excluded.  
53  
54  
55  
56  
57

### 58 Study Characteristics



1  
2  
3  
4 Eligible studies must include both a group of gastric cancer patients and a group of  
5 non-cancer patients whose diagnoses were confirmed by both clinical and histological  
6 evaluations. All the samples of eligible studies will be limited to surgical or endoscopic  
7 gastric biopsy tissues. Studies using fecal or oral samples will be excluded to prevent  
8 the interference by intestinal and oral microbiota. In order to control the methodological  
9 heterogeneity of included studies, the sequencing technology will be limited to 16s  
10 rRNA of 16s rDNA sequencing.  
11  
12  
13  
14  
15  
16  
17  
18

### 19 Phenomenon of interest

20  
21 Studies must report either the relative abundance of bacteria at the phylum or genus  
22 levels, or at least one of the Alpha diversity indexes (the number of operational  
23 taxonomic units (OUTs), Shannon index, Chao1 index, phylogenetic diversity, etc.)  
24 respectively and clearly in both gastric cancer and non-cancer groups.  
25  
26  
27  
28  
29  
30

### 31 Types of participants

32  
33 In this systematic review, participants are 18 years of age or older. Patients diagnosed  
34 with gastric cancer or non-gastric cancer should be confirmed by both clinical and  
35 histological evaluations. We set no limitations on other patient characteristics.  
36  
37  
38  
39  
40

### 41 Literature searching strategies

42  
43 We will search the following database: PubMed, EMBASE, and Cochrane up to 1  
44 March 2021. We will use both free-text and mesh terms to increase sensitivity. Our  
45 search strategy in PubMed is: ((“microbiome” OR “microbial” OR “microbiota”  
46 [MeSH Terms]) OR “microflora” OR “bacterial” OR “dysbiosis”) AND (“gastric”  
47 [MeSH Terms] OR “stomach” OR “upper digestive tract” OR “upper gastrointestinal  
48 tract”) AND ((“lesion” OR “cancer” [MeSH Terms] OR “neoplasia” OR “neoplasms”  
49 OR “malignancy” OR “tumor” OR “carcinoma” OR “adenocarcinoma” OR  
50 “pre malignancy” OR “pre malignant” OR “tumorigenesis” OR “carcinogenesis”) OR  
51 “intestinal metaplasia” OR “gastritis”) with the following filters: Humans,  
52  
53  
54  
55  
56  
57  
58  
59  
60

1  
2  
3  
4  
5  
6  
7  
8  
9  
10  
11  
12  
13  
14  
15  
16  
17  
18  
19  
20  
21  
22  
23  
24  
25  
26  
27  
28  
29  
30  
31  
32  
33  
34  
35  
36  
37  
38  
39  
40  
41  
42  
43  
44  
45  
46  
47  
48  
49  
50  
51  
52  
53  
54  
55  
56  
57  
58  
59  
60

Observational Study. EMBASE and Cochrane will also be searched using the same terms. We will also scan the conference proceedings and relevant references of review articles. We will set no limitations on public period and languages in literature searching.

## **Data Collection and analysis**

### **Selection of studies**

All the literature search results will be imported into a reference management software (Endnote), and duplicates will be removed. Two researchers (RYJ and XYZ) will preliminarily evaluate the eligibility of the articles by reading the titles and abstracts. All the candidate articles will then be divided into three categories: eligible, ineligible and pending. The ineligible articles will be eliminated from this study. Then, two researchers will independently read the full text of eligible and pending articles and articles meeting the inclusion criteria will be recorded in the list. When disagreements occur between two lists, the whole review team will discuss and make the final decision. Reasons for exclusions in each step will be recorded in Endnote library.

### **Data Extraction and management**

We will extract data into an Excel form independently by two researchers (RYJ and XYZ). A senior researcher (YYY) will double-check the extracted data. Disagreements will be resolved by the whole team. We will retrieve the following information from the included studies:

Information of the study: publication (authors, year, journal title, format), study design (patient inclusion and exclusion criteria, source of samples, number of groups and the sample size of each, sequencing technology), bias control.

Patient characteristics: demographics (age, sex, country, ethnicity), lesion location and histological diagnosis.

Outcome data: The relative abundance of bacteria at the phylum or genera levels, Alpha diversity indexes which include the number of operational taxonomic units

(OUTs), Shannon index, Chao1 index and phylogenetic diversity.

All the available materials will be utilized to extract required information. We will make use of the materials including but not limited to published and unpublished articles or reports, online appendices, registration information, etc. If required information is not clearly and completely recorded on the above sources, we will try to contact the corresponding author for help by e-mail.

#### Risk of bias assessment

Considering that we only include observational studies in this systematic review, we will use the Newcastle Ottawa Scale (NOS) which is a scoring system designed to evaluate the risk of bias in non-randomized studies.<sup>[16]</sup> The assessment will be evaluated from three domains: selection, comparability and outcome. The evaluation of the risk of bias will be performed independently by two researchers (RYJ and XYZ). Disagreements during this process will be discussed and resolved by the whole team.

#### Data synthesis and statistical analysis

Basic characteristics of included studies will be firstly tabulated (eg, study type and main outcomes). The main outcomes refer to the changes in the composition of gastric microbiota (both statistically significant and non-significant) between cancer and non-cancer patients. Only bacterial phylum or genera reported by five or more articles will be included in further meta-analysis.

We will then extract summary comparison data as mean differences. If sufficient original data are accessible, we will calculate the measures when required. We will use the univariate analyses results unless multiple regression analyses are conducted. Moreover, we will extract the results from the regression model with the largest number of covariates if multiple models are used.

Considering the certain variations in effect sizes across included studies owing to different populations and study characteristics, a random-effects model will be used in this study.

1  
2  
3  
4 Subgroup analyses will be conducted regarding the changes in the composition of  
5 gastric microbiota between different stages of non-cancer lesions (non-atrophic gastritis,  
6 atrophic gastritis, intestinal metaplasia and intraepithelial neoplasia) and gastric cancer,  
7 if possible.  
8  
9

10  
11 We will evaluate heterogeneity across included studies using the Cochrane chi-  
12 square ( $\chi^2$ ) and quantified with the  $I^2$  statistics.<sup>[17]</sup>  $I^2$  values of 25%, 50% and 75%  
13 represent low, moderate and high heterogeneity, respectively.<sup>[18]</sup> Potential publication  
14 bias will be assessed by visual inspection of funnel plots, and the asymmetry of the  
15 funnel plot will be statistically examined by Eggers test. All analyses will be  
16 performed using Review Manager 5.3.3 (Nordic Cochrane Centre, Copenhagen,  
17 Denmark). An alpha value of  $<0.05$  will be considered statistically significant.  
18  
19  
20  
21  
22  
23  
24  
25  
26

### 27 **Patient and public involvement**

28  
29 Patients or the public are not involved in in the design, or conduct, or reporting,  
30 or dissemination plans of our research.  
31  
32  
33

### 34 **Ethics and dissemination**

35  
36 This study is based on published data and will not include any human participants,  
37 thus the ethical approval is not required. We have not published any data in a data  
38 repository as formal data collection has not started yet. The results of this study are  
39 expected to be published in peer-reviewed journals or conference abstracts.  
40  
41  
42  
43  
44  
45

### 46 **Discussion**

47  
48 Consecutive alternation of gastric microbiota composition during the development  
49 of gastric cancer has been reported and has attracted increasing attention. However, the  
50 changing pattern during this process remains largely unclear as the results differed  
51 across published articles.<sup>[10, 12]</sup> Our systematic review and meta-analysis will evaluate  
52 the changes in the gastric microbiota composition, in detail, the changes in microbial  
53 diversity and relative abundance of bacteria at the phylum and genera levels between  
54  
55  
56  
57  
58  
59  
60

1  
2  
3  
4 cancer and non-cancer patients. Through these, the study has several potential clinical  
5 implications. Firstly, to clarify the changing regularity of gastric microbiota  
6 composition during carcinogenesis. Secondly, to identify specific microorganisms  
7 which may be the core microorganisms involved in the development of gastric cancer  
8 and potential new drugs or microbial therapy targets. The above two points may provide  
9 hints for the research hotspot which investigates the involvement of gastric  
10 microorganisms in gastric mucosal immunity and its impact on the pathogenesis of  
11 gastric cancer.<sup>[19]</sup> Thirdly, the detection of changes in gastric microbiota may be an  
12 early signal for gastric carcinogenesis, which may assist the early diagnosis of gastric  
13 cancer. Despite the above clinical implications, our study has several limitations. Given  
14 the result of pilot literature research, most of the potential eligible studies, if not all, are  
15 observational studies. Therefore, we anticipate a large heterogeneity across these  
16 studies. Nevertheless, gastric microbiota, especially non-*H.Pylori* bacteria is a  
17 relatively young field, and the number of included studies is expected to be small. For  
18 certain bacteria, although their relative abundance may change significantly during  
19 gastric carcinogenesis, they may not be included in meta-analysis because they have  
20 only been reported in less than five articles, limiting our findings. Hence, with the  
21 continuous publication of articles in this field, the update of meta-analysis is warranted.  
22  
23  
24  
25  
26  
27  
28  
29  
30  
31  
32  
33  
34  
35  
36  
37  
38  
39  
40

## 41 References

- 42 1. Lynch SV, Pedersen O. The Human Intestinal Microbiome in Health and Disease.  
43 *The New England journal of medicine* 2016;375:2369-79.
- 44 2. Ianiro G, Molina-Infante J, Gasbarrini A. Gastric Microbiota. *Helicobacter*  
45 2015;20(Suppl 1):68-71.
- 46 3. Bray F, Ferlay J, Soerjomataram I, et al. Global cancer statistics 2018: GLOBOCAN  
47 estimates of incidence and mortality worldwide for 36 cancers in 185 countries. *CA: a*  
48 *cancer journal for clinicians* 2018;68:394-424.
- 49 4. Feng RM, Zong YN, Cao SM, et al. Current cancer situation in China: good or bad  
50 news from the 2018 Global Cancer Statistics? *Cancer communications (London,*  
51  
52  
53  
54  
55  
56  
57  
58  
59  
60

1  
2  
3  
4  
5  
6  
7  
8  
9  
10  
11  
12  
13  
14  
15  
16  
17  
18  
19  
20  
21  
22  
23  
24  
25  
26  
27  
28  
29  
30  
31  
32  
33  
34  
35  
36  
37  
38  
39  
40  
41  
42  
43  
44  
45  
46  
47  
48  
49  
50  
51  
52  
53  
54  
55  
56  
57  
58  
59  
60

England) 2019;39:22.

5. Correa P. Human gastric carcinogenesis: a multistep and multifactorial process--First American Cancer Society Award Lecture on Cancer Epidemiology and Prevention. *Cancer research* 1992;52:6735-40.

6. Malfertheiner P, Megraud F, O'Morain CA, et al. Management of Helicobacter pylori infection-the Maastricht V/Florence Consensus Report. *Gut* 2017;66:6-30.

7. Shah MA. Gastric cancer: The gastric microbiota - bacterial diversity and implications. *Nature reviews Gastroenterology & hepatology* 2017;14:692-93.

8. Ma JL, Zhang L, Brown LM, et al. Fifteen-year effects of Helicobacter pylori, garlic, and vitamin treatments on gastric cancer incidence and mortality. *Journal of the National Cancer Institute* 2012;104:488-92.

9. Gao JJ, Zhang Y, Gerhard M, et al. Association Between Gut Microbiota and Helicobacter pylori-Related Gastric Lesions in a High-Risk Population of Gastric Cancer. *Frontiers in cellular and infection microbiology* 2018;8:202.

10. Dias-Jácome E, Libânio D, Borges-Canha M, et al. Gastric microbiota and carcinogenesis: the role of non-Helicobacter pylori bacteria - A systematic review. *Revista espanola de enfermedades digestivas : organo oficial de la Sociedad Espanola de Patologia Digestiva* 2016;108:530-40.

11. Li J, Perez Perez GI. Is There a Role for the Non-Helicobacter pylori Bacteria in the Risk of Developing Gastric Cancer? *International journal of molecular sciences* 2018;19.

12. Zhang S, Shi D, Li M, et al. The relationship between gastric microbiota and gastric disease. *Scandinavian journal of gastroenterology* 2019;54:391-96.

13. Nardone G, Compare D, Rocco A. A microbiota-centric view of diseases of the upper gastrointestinal tract. *The lancet Gastroenterology & hepatology* 2017;2:298-312.

14. Arumugam M, Raes J, Pelletier E, et al. Enterotypes of the human gut microbiome. *Nature* 2011;473:174-80.

15. Shamseer L, Moher D, Clarke M, et al. Preferred reporting items for systematic review and meta-analysis protocols (PRISMA-P) 2015: elaboration and explanation.

1  
2  
3  
4 *BMJ (Clinical research ed)* 2015;350:g7647.

5 16. Stang A. Critical evaluation of the Newcastle-Ottawa scale for the assessment of  
6 the quality of nonrandomized studies in meta-analyses. *European journal of*  
7 *epidemiology* 2010;25:603-5.

8  
9  
10  
11 17. Higgins JP, Thompson SG. Quantifying heterogeneity in a meta-analysis. *Statistics*  
12 *in medicine* 2002;21:1539-58.

13  
14  
15 18. Higgins JP, Thompson SG, Deeks JJ, et al. Measuring inconsistency in meta-  
16 analyses. *BMJ (Clinical research ed)* 2003;327:557-60.

17  
18  
19 19. Nie S, Yuan Y. The Role of Gastric Mucosal Immunity in Gastric Diseases. *Journal*  
20 *of immunology research* 2020;2020:7927054.

21  
22  
23  
24  
25 **Authors' contributions:** YYY is the guarantors of this systematic review, initiated this  
26 research and designed the systematic review protocol. RYJ, XYZ and YZZ contributed  
27 to the design and revise of the systematic review protocol. RYJ, XYZ and XYC  
28 completed the pilot literature search and will conduct the formal selection of studies,  
29 data extraction, evaluation of risk of bias and quantitative synthesis. RYJ, XYZ and  
30 YYY drafted the manuscript. All the authors will involve in result interpretation. All  
31 the authors contributed to the review and revision and approved the publication.

32  
33  
34  
35  
36  
37  
38  
39  
40  
41 **Funding statement:** This work was supported by Peking Union Medical College  
42 Hospital Youth Program grant number punch201911356. The sponsor has not been  
43 involved in study design, data collection, data analysis and result interpretation.

44  
45  
46  
47  
48  
49 **Competing interests statement:** None declared.

50  
51  
52 **Patient consent for publication:** Not required.

53  
54  
55  
56  
57  
58  
59 **Ethics approval:** Ethics approval for this study is not required, since the whole study  
60 is based exclusively on published documents with individual data involved.

**Word Count: 1851**

For peer review only

1  
2  
3  
4  
5  
6  
7  
8  
9  
10  
11  
12  
13  
14  
15  
16  
17  
18  
19  
20  
21  
22  
23  
24  
25  
26  
27  
28  
29  
30  
31  
32  
33  
34  
35  
36  
37  
38  
39  
40  
41  
42  
43  
44  
45  
46  
47  
48  
49  
50  
51  
52  
53  
54  
55  
56  
57  
58  
59  
60



**PRISMA-P (Preferred Reporting Items for Systematic review and Meta-Analysis Protocols) 2015 checklist: recommended items to address in a systematic review protocol\***

| Section and topic                 | Item No | Checklist item                                                                                                                                                                                                                | Present in review Y/N | Page and Line                     |
|-----------------------------------|---------|-------------------------------------------------------------------------------------------------------------------------------------------------------------------------------------------------------------------------------|-----------------------|-----------------------------------|
| <b>ADMINISTRATIVE INFORMATION</b> |         |                                                                                                                                                                                                                               |                       |                                   |
| Title:                            |         |                                                                                                                                                                                                                               |                       |                                   |
| Identification                    | 1a      | Identify the report as a protocol of a systematic review                                                                                                                                                                      | Yes                   | Page 1 Line 3                     |
|                                   | Update  | 1b If the protocol is for an update of a previous systematic review, identify as such                                                                                                                                         | No                    | /                                 |
| Registration                      | 2       | If registered, provide the name of the registry (such as PROSPERO) and registration number                                                                                                                                    | Yes                   | Page 2 Line 26                    |
| Authors:                          |         |                                                                                                                                                                                                                               |                       |                                   |
| Contact                           | 3a      | Provide name, institutional affiliation, e-mail address of all protocol authors; provide physical mailing address of corresponding author                                                                                     | Yes                   | Page 1 Line 2-25                  |
|                                   | 3b      | Describe contributions of protocol authors and identify the guarantor of the review                                                                                                                                           | Yes                   | Page 12 Line 11-17                |
| Contributions                     |         |                                                                                                                                                                                                                               |                       |                                   |
| Amendments                        | 4       | If the protocol represents an amendment of a previously completed or published protocol, identify as such and list changes; otherwise, state plan for documenting important protocol amendments                               | No                    | /                                 |
| Support:                          |         |                                                                                                                                                                                                                               |                       |                                   |
| Sources                           | 5a      | Indicate sources of financial or other support for the review                                                                                                                                                                 | Yes                   | Page 12 Line 19-21                |
| Sponsor                           | 5b      | Provide name for the review funder and/or sponsor                                                                                                                                                                             | Yes                   | Page 12 Line 19-21                |
| Role of sponsor or funder         | 5c      | Describe roles of funder(s), sponsor(s), and/or institution(s), if any, in developing the protocol                                                                                                                            | Yes                   | Page 12 Line 19-21                |
| <b>INTRODUCTION</b>               |         |                                                                                                                                                                                                                               |                       |                                   |
| Rationale                         | 6       | Describe the rationale for the review in the context of what is already known                                                                                                                                                 | Yes                   | Page 4 Line 3-<br>Page 5 Line 5   |
| Objectives                        | 7       | Provide an explicit statement of the question(s) the review will address with reference to participants, interventions, comparators, and outcomes (PICO)                                                                      | Yes                   | Page 5 Line 11-14                 |
| <b>METHODS</b>                    |         |                                                                                                                                                                                                                               |                       |                                   |
| Eligibility criteria              | 8       | Specify the study characteristics (such as PICO, study design, setting, time frame) and report characteristics (such as years considered, language, publication status) to be used as criteria for eligibility for the review | Yes                   | Page 5 Line 24-<br>Page 6 Line 18 |

|                                    |     |                                                                                                                                                                                                                                                  |     |                                      |
|------------------------------------|-----|--------------------------------------------------------------------------------------------------------------------------------------------------------------------------------------------------------------------------------------------------|-----|--------------------------------------|
| Information sources                | 9   | Describe all intended information sources (such as electronic databases, contact with study authors, trial registers or other grey literature sources) with planned dates of coverage                                                            | Yes | Page 6 Line 21-<br>Page 7 Line 3     |
| Search strategy                    | 10  | Present draft of search strategy to be used for at least one electronic database, including planned limits, such that it could be repeated                                                                                                       | Yes | Page 6 Line 21-<br>Page 7 Line 3     |
| Study records:                     |     |                                                                                                                                                                                                                                                  |     |                                      |
| Data management                    | 11a | Describe the mechanism(s) that will be used to manage records and data throughout the review                                                                                                                                                     | Yes | Page 7 Line 18-21                    |
| Selection process                  | 11b | State the process that will be used for selecting studies (such as two independent reviewers) through each phase of the review (that is, screening, eligibility and inclusion in meta-analysis)                                                  | Yes | Page 7 Line 7-15                     |
| Data collection process            | 11c | Describe planned method of extracting data from reports (such as piloting forms, done independently, in duplicate), any processes for obtaining and confirming data from investigators                                                           | Yes | Page 7 Line 18-21<br>Page 8 Line 1-5 |
| Data items                         | 12  | List and define all variables for which data will be sought (such as PICO items, funding sources), any pre-planned data assumptions and simplifications                                                                                          | Yes | Page 7 Line 22-29                    |
| Outcomes and prioritization        | 13  | List and define all outcomes for which data will be sought, including prioritization of main and additional outcomes, with rationale                                                                                                             | Yes | Page 6 Line 10-13                    |
| Risk of bias in individual studies | 14  | Describe anticipated methods for assessing risk of bias of individual studies, including whether this will be done at the outcome or study level, or both; state how this information will be used in data synthesis                             | Yes | Page 8 Line 8-13                     |
| Data synthesis                     | 15a | Describe criteria under which study data will be quantitatively synthesised                                                                                                                                                                      | Yes | Page 8 Line 16-<br>Page 9 Line 10    |
|                                    | 15b | If data are appropriate for quantitative synthesis, describe planned summary measures, methods of handling data and methods of combining data from studies, including any planned exploration of consistency (such as $I^2$ , Kendall's $\tau$ ) | Yes | Page 8 Line 16-<br>Page 9 Line 10    |
|                                    | 15c | Describe any proposed additional analyses (such as sensitivity or subgroup analyses, meta-regression)                                                                                                                                            | Yes | Page 8 Line 30-<br>Page 9 Line 3     |
|                                    | 15d | If quantitative synthesis is not appropriate, describe the type of summary planned                                                                                                                                                               | Yes | Page 8 Line 16-20                    |
| Meta-bias(es)                      | 16  | Specify any planned assessment of meta-bias(es) (such as publication bias across studies, selective reporting within studies)                                                                                                                    | No  | /                                    |
| Confidence in cumulative evidence  | 17  | Describe how the strength of the body of evidence will be assessed (such as GRADE)                                                                                                                                                               | No  | /                                    |

1  
2  
3  
4  
5  
6  
7  
8  
9  
10  
11  
12  
13  
14  
15  
16  
17  
18  
19  
20  
21  
22  
23  
24  
25  
26  
27  
28  
29  
30  
31  
32  
33  
34  
35  
36  
37  
38  
39  
40  
41  
42  
43  
44  
45  
46

**\* It is strongly recommended that this checklist be read in conjunction with the PRISMA-P Explanation and Elaboration (cite when available) for important clarification on the items. Amendments to a review protocol should be tracked and dated. The copyright for PRISMA-P (including checklist) is held by the PRISMA-P Group and is distributed under a Creative Commons Attribution Licence 4.0.**

*From: Shamseer L, Moher D, Clarke M, Ghersi D, Liberati A, Petticrew M, Shekelle P, Stewart L, PRISMA-P Group. Preferred reporting items for systematic review and meta-analysis protocols (PRISMA-P) 2015: elaboration and explanation. BMJ. 2015 Jan 2;349(jan02 1):g7647.*

For peer review only

# BMJ Open

## Changes in gastric mucosal microbiota in gastric carcinogenesis: a systematic review protocol

|                                 |                                                                                                                                                                                                                                                                                                                                                                                                                                                                                        |
|---------------------------------|----------------------------------------------------------------------------------------------------------------------------------------------------------------------------------------------------------------------------------------------------------------------------------------------------------------------------------------------------------------------------------------------------------------------------------------------------------------------------------------|
| Journal:                        | <i>BMJ Open</i>                                                                                                                                                                                                                                                                                                                                                                                                                                                                        |
| Manuscript ID                   | bmjopen-2020-045810.R1                                                                                                                                                                                                                                                                                                                                                                                                                                                                 |
| Article Type:                   | Protocol                                                                                                                                                                                                                                                                                                                                                                                                                                                                               |
| Date Submitted by the Author:   | 04-Feb-2021                                                                                                                                                                                                                                                                                                                                                                                                                                                                            |
| Complete List of Authors:       | Ji, Ruoyu; Peking Union Medical College Hospital, Department of Gastroenterology<br>Zhao, Xinyu; Capital Medical University Affiliated Beijing Friendship Hospital, Department of Clinical Epidemiology and EBM<br>Cao, Xinyuan; Peking Union Medical College Hospital, Department of Gastroenterology<br>Zhang, Yizhen; Peking Union Medical College Hospital, Department of Gastroenterology<br>Yang, Yingyun; Peking Union Medical College Hospital, Department of Gastroenterology |
| <b>Primary Subject Heading</b>: | Gastroenterology and hepatology                                                                                                                                                                                                                                                                                                                                                                                                                                                        |
| Secondary Subject Heading:      | Gastroenterology and hepatology, Oncology                                                                                                                                                                                                                                                                                                                                                                                                                                              |
| Keywords:                       | BACTERIOLOGY, GASTROENTEROLOGY, Gastrointestinal tumours < ONCOLOGY                                                                                                                                                                                                                                                                                                                                                                                                                    |
|                                 |                                                                                                                                                                                                                                                                                                                                                                                                                                                                                        |

SCHOLARONE™  
Manuscripts



I, the Submitting Author has the right to grant and does grant on behalf of all authors of the Work (as defined in the below author licence), an exclusive licence and/or a non-exclusive licence for contributions from authors who are: i) UK Crown employees; ii) where BMJ has agreed a CC-BY licence shall apply, and/or iii) in accordance with the terms applicable for US Federal Government officers or employees acting as part of their official duties; on a worldwide, perpetual, irrevocable, royalty-free basis to BMJ Publishing Group Ltd ("BMJ") its licensees and where the relevant Journal is co-owned by BMJ to the co-owners of the Journal, to publish the Work in this journal and any other BMJ products and to exploit all rights, as set out in our [licence](#).

The Submitting Author accepts and understands that any supply made under these terms is made by BMJ to the Submitting Author unless you are acting as an employee on behalf of your employer or a postgraduate student of an affiliated institution which is paying any applicable article publishing charge ("APC") for Open Access articles. Where the Submitting Author wishes to make the Work available on an Open Access basis (and intends to pay the relevant APC), the terms of reuse of such Open Access shall be governed by a Creative Commons licence – details of these licences and which [Creative Commons](#) licence will apply to this Work are set out in our licence referred to above.

Other than as permitted in any relevant BMJ Author's Self Archiving Policies, I confirm this Work has not been accepted for publication elsewhere, is not being considered for publication elsewhere and does not duplicate material already published. I confirm all authors consent to publication of this Work and authorise the granting of this licence.

**TITLE PAGE****Changes in gastric mucosal microbiota in gastric carcinogenesis: a systematic  
review protocol****Ruoyu Ji<sup>1</sup>, Xinyu Zhao<sup>2</sup>, Xinyuan Cao<sup>1</sup>, Yizhen Zhang<sup>1</sup>, Yingyun Yang<sup>1\*</sup>**

<sup>1</sup> Department of Gastroenterology, Peking Union Medical College Hospital (PUMCH), Chinese Academy of Medical Sciences & Peking Union Medical College (CAMS & PUMC), Beijing, 100730, China.

<sup>2</sup> Department of Clinical Epidemiology and EBM, Beijing Friendship Hospital, Capital Medical University; National Clinical Research Center for Digestive Diseases, Beijing 100050, China.

Ruoyu Ji and Xinyu Zhao contributed equally to this work. Ruoyu Ji and Xinyu Zhao are joint first authors.

**\*Correspondence:**

Dr Yingyun Yang, Department of Gastroenterology, Peking Union Medical College Hospital (PUMCH), Chinese Academy of Medical Sciences & Peking Union Medical College (CAMS & PUMC), Beijing, 100730, China. E-mail: yangyingyun@pumch.cn; Phone: 86-18510031805.

**Keywords:** Microbiota; Gastric cancer; Systematic review**Word Count:** 2000

## ABSTRACT

**Introduction:** The human stomach is a complex and diverse microbial ecosystem. Consecutive alternations of gastric microbiota occur in gastric carcinogenesis, while the changing pattern during this process remains controversial across studies. We aim to identify the changes in the diversity and composition of gastric mucosal microbiota in gastric tumorigenesis.

**Methods and analysis:** We will search through PubMed, Embase and Cochrane databases, as well as conference proceedings and references of review articles for observational articles reporting either the relative abundance of bacteria at the phylum or genus level, or at least one of the alpha diversity indexes respectively and clearly in both gastric cancer and non-cancer groups. Selection of studies and data extraction will be performed independently by two researchers. Disagreements will be resolved through discussion. Risk of bias will be assessed using the modified Newcastle Ottawa Scale (NOS). Quantitative analyses will be performed using a random-effects model, where the effect measurement will be expressed as the mean differences.

**Ethics and Dissemination:** Ethical approval for this systematic review is not required, as the study is based exclusively on published documents and will not include any individual data. Findings of this study are expected to be disseminated through peer-reviewed journals or conference proceedings.

1  
2  
3  
4 **PROSPERO registration number:** CRD42020206973  
5  
6  
7  
8

9 **Strengths and limitations of this study**  
10

11 1 This systematic review will comprehensively identify changes in gastric mucosal  
12 microbiota diversity and composition during gastric carcinogenesis, an important but  
13 controversial clinical issue.  
14  
15  
16  
17

18 2 Limited statistical power in published articles will be resolved through quantitative  
19 synthesis.  
20  
21  
22  
23

24 3 Selection of articles, data extraction and evaluation of risk of bias will be performed  
25 by two researchers independently with disagreements resolved through discussion,  
26 minimizing the potential personal biases.  
27  
28  
29  
30

31 4 Given that the majority of studies concerning this issue are observational studies, we  
32 anticipate large heterogeneity across studies.  
33  
34  
35  
36  
37  
38  
39  
40  
41  
42  
43  
44  
45  
46  
47  
48  
49  
50  
51  
52  
53  
54  
55  
56  
57  
58  
59  
60



## MAIN TEXT

### Introduction

The human gastrointestinal tract is a complex and diverse microbial ecosystem which contains numerous microorganisms. Through interactions, microbes regulate a variety of physiological processes, as well as the occurrence and development of diseases.<sup>[1]</sup> Until the discovery of *Helicobacter pylori* (*H. pylori*) in 1983, the stomach was thought to be a sterile environment, given its high gastric acid content and strict antimicrobial mechanisms. However, recent advances in high-throughput sequencing technology<sup>5</sup> have helped uncover the unique and complex composition of gastric microbiota.<sup>[2]</sup>

Gastric cancer is the fifth most prevalent malignancy (1,033,701 new cases in 2018) and the third cause of cancer death (782,685 deaths in 2018) worldwide. The morbidity of gastric cancer continues to increase in recent years, particularly in regions with a high incidence of this disease, such as China and other Asian countries.<sup>[3, 4]</sup> The Correa's model of gastric carcinogenesis postulates that normal gastric mucosa will go through the progressive histological stages from non-atrophic gastritis, atrophic gastritis, intestinal metaplasia, intraepithelial neoplasia and eventually to gastric cancer.<sup>[5]</sup> Numerous studies have implicated *H. Pylori* infection in the development of gastric cancer.<sup>[6]</sup> However, only about 1% of patients with *H.Pylori*-induced chronic gastritis ultimately develop cancer,<sup>[7]</sup> and the eradication of *H.Pylori* does not completely prevent carcinogenesis.<sup>[8, 9]</sup> On the other hand, increasing evidence has shifted the paradigm from *H.Pylori* infection to the gastric microbiota dysbiosis, for the development of gastric cancer.<sup>[10, 11]</sup>

1  
2  
3  
4 Studies have demonstrated remarkable differences in gastric microbiota profile  
5  
6 between non-cancer individuals and gastric cancer patients, with microbial diversity  
7  
8 changed and enrichments of certain bacteria while depletions of others.<sup>[10, 12]</sup>  
9  
10 Identifying the changes in gastric microbiota profile may help in prevention, early  
11  
12 diagnosis and management of gastric cancer. However, the gastric microbiota is diverse  
13  
14 and dynamic, and may be affected by several factors and differs geographically and  
15  
16 ethnically.<sup>[13, 14]</sup> Discrepancies were found across present studies, and the small sample  
17  
18 sizes and heterogeneity of published studies have compromised the overall  
19  
20 understanding of this issue. This underscores the need to perform a systematic review  
21  
22 and meta-analysis to evaluate and to provide stronger evidence for the changes in the  
23  
24 diversity and composition of gastric mucosal microbiota in gastric carcinogenesis.  
25  
26  
27  
28  
29  
30  
31  
32  
33  
34

### 35 **Objectives**

36  
37 The purpose of this research protocol is to outline a systematic review and meta-  
38  
39 analysis which evaluates the changes in the diversity of gastric microbiota and the  
40  
41 relative abundance of bacterial phyla and genera in the development of gastric cancer.  
42  
43  
44  
45  
46  
47

### 48 **Methods and Analysis**

49  
50 Registration of this protocol has been completed on the PROSPERO (International  
51  
52 Prospective Register of Systematic Reviews) website, under the registration number  
53  
54 CRD42020206973. Our protocol adheres to the guideline of the Preferred Reporting  
55  
56 Items for Systematic Review and Meta-Analysis Protocols (PRISMA-P) statement.<sup>[15]</sup>  
57  
58  
59  
60

1  
2  
3  
4 Reporting items are detailed in PRISMA-P checklists (supplementary appendix 1).  
5  
6  
7  
8

## 9 **Inclusion criteria**

### 10 Types of studies

11  
12  
13  
14 This systematic review will include observational (cross-sectional, case-control,  
15  
16  
17 prospective and retrospective cohorts) human studies.  
18  
19

### 20 Study characteristics

21  
22  
23  
24 Eligible studies should include both a group of gastric cancer patients and a group of  
25  
26  
27 non-cancer patients whose diagnoses are confirmed by both clinical and histological  
28  
29  
30 evaluation. For histological evaluation, the gastric cancer should be confirmed as  
31  
32  
33 gastric adenocarcinoma. Histological diagnoses of non-cancer histological types  
34  
35  
36 including normal gastric mucosa, non-atrophic gastritis, atrophic gastritis and intestinal  
37  
38  
39 metaplasia shall comply with updated Sydney System.<sup>[16]</sup> Accordingly, normal gastric  
40  
41  
42 mucosa is defined as normal epithelium and glandular compartments with only  
43  
44  
45 individual scattered chronic inflammatory cells. Non-atrophic gastritis is defined as  
46  
47  
48 increased infiltration of chronic inflammatory cells without loss of gastric glands proper.  
49  
50  
51 Atrophic gastritis is defined as loss of gastric glands proper. Intestinal metaplasia is  
52  
53  
54 defined as the presence of goblet cells, absorptive cells, and cells resembling  
55  
56  
57 colonocytes in the area of glands and mucosal epithelium. The diagnosis of  
58  
59  
60 intraepithelial neoplasia should be confirmed by revised Vienna classification  
system.<sup>[17]</sup> The *H. pylori* infection status should be determined on the basis of <sup>13</sup>C urea

1  
2  
3  
4 breath test or histological assessment. The source of samples will be limited to gastric  
5  
6 biopsy samples (surgical or endoscopic). Studies based on fecal or oral samples will be  
7  
8 excluded to avoid interference from intestinal and oral microbiota. In order to control  
9  
10 methodological heterogeneity, we will only include studies using high-throughput  
11  
12 sequencing technology.  
13  
14  
15

### 16 17 18 19 Phenomenon of interest

20  
21  
22 Studies must report either the relative abundance of bacteria at the phylum or genus  
23  
24 level, or at least one of the alpha diversity indexes (the number of operational taxonomic  
25  
26 units (OTUs), Shannon index, Chao 1 index, phylogenetic diversity, etc.) in both gastric  
27  
28 cancer and non-cancer groups.  
29  
30  
31

### 32 33 34 35 Types of participants

36  
37 We will only include participants who are 18 years or older. There are no further  
38  
39 limitations on patient characteristics.  
40  
41  
42  
43  
44

### 45 46 47 **Literature searching strategy**

48  
49 We will search through PubMed, EMBASE and Cochrane databases for articles  
50  
51 published up to 1 March 2021. The search terms shall include both free-text and mesh  
52  
53 terms to improve the search efficiency. Our search strategy in PubMed  
54  
55 is: (“microbiome” OR “microbial” OR “microbiota” [MeSH Terms]) OR “microflora”  
56  
57 OR “bacterial” OR “dysbiosis”) AND (“gastric” [MeSH Terms] OR “stomach” OR  
58  
59  
60

1  
2  
3  
4 “upper digestive tract” OR “upper gastrointestinal tract”) AND ((“lesion” OR “cancer”  
5  
6 [MeSH Terms] OR “neoplasia” OR “neoplasms” OR “malignancy” OR “tumor” OR  
7  
8 “carcinoma” OR “adenocarcinoma” OR “pre malignancy” OR “pre malignant” OR  
9  
10 “tumorigenesis” OR “carcinogenesis”) OR “intestinal metaplasia” OR “gastritis”) with  
11  
12 the filter: “Humans”. The search strategy will be adapted for EMBASE and Cochrane  
13  
14 databases. We will also search conference proceedings and the references of review  
15  
16 articles for additional relevant studies. We will set no limitations on publication period  
17  
18 or language.  
19  
20  
21  
22  
23  
24  
25  
26

## 27 **Data Collection and analysis**

### 28 Selection of studies

29  
30  
31  
32 Literature search results will be imported into a reference management software  
33  
34 (Endnote), and duplicates will be removed. Two researchers (RYJ and XYZ) will  
35  
36 preliminarily evaluate the eligibility of the articles by reading the title and abstract. The  
37  
38 articles will then be divided into three categories: eligible, ineligible and pending.  
39  
40 Ineligible articles will be eliminated. Two researchers will then independently read the  
41  
42 full texts of eligible and pending articles and articles meeting inclusion criteria will be  
43  
44 recorded. Disagreements between the two researchers will be resolved by rechecking  
45  
46 the article and discussion. Reasons for exclusions in each step will be recorded in  
47  
48 Endnote library.  
49  
50  
51  
52  
53  
54

### 55 Data Extraction and management

1  
2  
3  
4 The data will be imported into Excel independently by two researchers (RYJ and  
5  
6 XYZ). A senior researcher (YYY) will double-check the extracted data. Disagreements  
7  
8 will be resolved through team discussion. We will retrieve the following information  
9  
10 from each included study:  
11  
12

13  
14 Information of the study: publication (authors, year, journal title, format), study  
15  
16 design (patient inclusion and exclusion criteria, source of samples, grouping and the  
17  
18 sample size of each, sequencing technology), bias control.  
19  
20

21  
22 Patient characteristics: demographics (age, sex, country or region, race/ethnicity,  
23  
24 comorbidities), lesion location, clinical and histological diagnosis and *H. pylori*  
25  
26 infection status.  
27  
28

29  
30 Outcome data: The relative abundance of bacteria at the phylum or genus level, alpha  
31  
32 diversity indexes which include OTUs, Shannon index, Chao 1 index, phylogenetic  
33  
34 diversity, etc.  
35  
36

37  
38 We will retrieve patient characteristics and outcome data in the cancer group and  
39  
40 each histological type of non-cancer group, respectively. We will make full use of all  
41  
42 available materials including published and unpublished articles or reports, online  
43  
44 appendices, registration information, etc. If required information is not clearly and  
45  
46 completely recorded on the above sources, we will attempt to contact the corresponding  
47  
48 author by e-mail.  
49  
50  
51

#### 52 53 54 55 56 Risk of bias assessment

57  
58 We will assess the risk of bias using a modified Newcastle-Ottawa Scale (NOS)  
59  
60

1  
2  
3  
4 (supplementary appendix 2). NOS is a scoring system designed to evaluate the risk of  
5  
6 bias in non-randomized studies, and we have incorporated adaptations based on the  
7  
8 original version<sup>[18]</sup> with the intention of best evaluating our phenomenon of interest.  
9  
10 The modified NOS additionally considers the following aspects: a) subdivision of non-  
11  
12 cancer lesions into normal gastric mucosa, non-atrophic gastritis, atrophic gastritis,  
13  
14 intestinal metaplasia and intraepithelial neoplasia according to histological evaluation,  
15  
16 b) clear exclusion criteria to prevent the impact of surgery or drugs on gastric  
17  
18 microbiota, c) sample size, d) adjusting for *H.pylori* infection status and other  
19  
20 demographic characteristics in analyses, e) description of detailed procedures and  
21  
22 quality control of experiments. The assessment will be evaluated from three domains:  
23  
24 selection, comparability and exposure (or outcome), and each study will be awarded  
25  
26 with a maximum of 11 scores. The evaluation of the risk of bias will be performed  
27  
28 independently by two researchers (RYJ and XYZ). Disagreements will be resolved  
29  
30 through team discussion.  
31  
32  
33  
34  
35  
36  
37  
38  
39  
40  
41  
42

#### 43 Data synthesis and statistical analysis

44  
45 Basic characteristics and major outcomes of included studies will be tabulated first.  
46  
47 The major outcomes refer to the changes in the diversity and composition of gastric  
48  
49 microbiota (both statistically significant and non-significant) between gastric cancer  
50  
51 and non-cancer groups. Only bacterial phyla or genera reported by five or more articles  
52  
53 will be included in further meta-analysis.  
54  
55  
56  
57

58 The mean differences [MD] with 95% confidence intervals [CI] will be calculated  
59  
60

1  
2  
3  
4 as effect measurements. If data are reported as the median with interquartile range, we  
5  
6 will convert them into the mean with standard deviation through a recommended  
7  
8 formula.<sup>[19]</sup> We will use the univariate analyses results unless multiple regression  
9  
10 analyses are conducted. Moreover, we will extract the results from the regression model  
11  
12 with the largest number of covariates if multiple models are used.  
13  
14  
15

16  
17 Additionally, we will compare the differences in alpha diversity indexes and relative  
18  
19 abundance of bacterial phyla and genera between each non-cancer histological type  
20  
21 (normal mucosa, non-atrophic gastritis, atrophic gastritis, intestinal metaplasia,  
22  
23 intraepithelial neoplasia) and the cancer group, respectively.  
24  
25  
26

27  
28 Considering the potential methodological, clinical and statistical heterogeneity  
29  
30 across included observational studies, a random-effects model will be used for data  
31  
32 analysis. We will evaluate heterogeneity across studies using the Cochrane chi-square  
33  
34 ( $\chi^2$ ) and quantified with the  $I^2$  statistics.<sup>[20]</sup>  $I^2$  values of 25%, 50% and 75% will  
35  
36 represent low, moderate and high heterogeneity, respectively.<sup>[21]</sup> Potential publication  
37  
38 bias will be assessed by visual inspection of funnel plots, and the asymmetry of the  
39  
40 funnel plot will be statistically examined using the Eggers test.  
41  
42  
43  
44

45  
46 We will conduct the following subgroup analyses to explore potential sources of  
47  
48 heterogeneity: age, sex, race/ethnicity, comorbidities, country or region, H. pylori  
49  
50 infection status, source of samples and sample size. Meta-regression will be performed  
51  
52 to identify sources of heterogeneity across studies.  
53  
54  
55

56  
57 All analyses will be performed using Review Manager V. 5.3.3 (Nordic Cochrane  
58  
59 Centre, Copenhagen, Denmark).  $P < 0.05$  will be considered statistically significant.  
60



## **Patient and public involvement**

Patients or the public are not involved in the design, or conduct, or reporting, or dissemination plans of our research.

## **Ethics and dissemination**

This study is based on published data and will not include any human participants, thus the ethical approval is not required. We have not published any data in a data repository as formal data collection has not started yet. Results of this study are expected to be published in peer-reviewed journals or conference abstracts.

## **Discussion**

Increasing evidence has indicated that consecutive alternations of gastric microbiota profile occur in gastric carcinogenesis. However, the changing pattern during this process remains largely unclear as the results differed across published articles.<sup>[10, 12]</sup> Our systematic review and meta-analysis aims to identify the changes in the diversity and composition of gastric microbiota along the normal to cancer cascade. Findings of this study have several potential clinical implications. Firstly, to clarify the changing regularity of gastric microbiota profile in gastric carcinogenesis. Secondly, to identify specific microorganisms enriched in gastric tumorigenesis. The above implications may provide hints for exploring the involvement of gastric microorganisms in gastric mucosal immunity and its impact on the pathogenesis of gastric cancer,<sup>[22]</sup> as well as

1  
2  
3  
4 developing potential microbial therapy targets. Thirdly, the detection of changes in  
5  
6 gastric microbiota may be a diagnostic biomarker for gastric cancer. Despite the above  
7  
8 clinical implications, our study has several limitations. Given the non-randomized  
9  
10 nature of included observational studies, we anticipate large interstudy heterogeneity.  
11  
12 Sources of heterogeneity should be further determined using subgroup analysis and  
13  
14 meta-regression. Moreover, gastric mucosal microbiota, especially non-*H.Pylori*  
15  
16 bacteria is a relatively young field, and the number of included studies is expected to  
17  
18 be small. In addition, because we will only quantitatively analyze bacteria reported in  
19  
20 at least five studies, certain important bacterial phyla and genera reported in lesser  
21  
22 articles may be missed. Hence, with the continuous publication of articles in this field,  
23  
24 the update of meta-analysis is warranted.  
25  
26  
27  
28  
29  
30  
31  
32  
33  
34

### 35 **References**

- 36 1. Lynch SV, Pedersen O. The Human Intestinal Microbiome in Health and Disease.  
37 *The New England journal of medicine* 2016;375:2369-79.
- 38 2. Ianiro G, Molina-Infante J, Gasbarrini A. Gastric Microbiota. *Helicobacter* 2015;20  
39 Suppl 1:68-71.
- 40 3. Bray F, Ferlay J, Soerjomataram I, et al. Global cancer statistics 2018: GLOBOCAN  
41 estimates of incidence and mortality worldwide for 36 cancers in 185 countries. *CA: a*  
42 *cancer journal for clinicians* 2018;68:394-424.
- 43 4. Feng RM, Zong YN, Cao SM, et al. Current cancer situation in China: good or bad  
44 news from the 2018 Global Cancer Statistics? *Cancer communications (London,*  
45 *England)* 2019;39:1-12.
- 46 5. Correa P. Human gastric carcinogenesis: a multistep and multifactorial process--First  
47 American Cancer Society Award Lecture on Cancer Epidemiology and Prevention.  
48 *Cancer Res* 1992;52:6735-40.
- 49  
50  
51  
52  
53  
54  
55  
56  
57  
58  
59  
60

- 1  
2  
3  
4 6. Malfertheiner P, Megraud F, O'Morain CA, et al. Management of *Helicobacter pylori*  
5 infection-the Maastricht V/Florence Consensus Report. *Gut* 2017;66:6-30.
- 6  
7 7. Shah MA. Gastric cancer: The gastric microbiota - bacterial diversity and  
8 implications. *Nature reviews Gastroenterology & hepatology* 2017;14:692-93.
- 9  
10 8. Ma JL, Zhang L, Brown LM, et al. Fifteen-year effects of *Helicobacter pylori*, garlic,  
11 and vitamin treatments on gastric cancer incidence and mortality. *J Natl Cancer Inst*  
12 2012;104:488-92.
- 13  
14 9. Gao JJ, Zhang Y, Gerhard M, et al. Association Between Gut Microbiota and  
15 *Helicobacter pylori*-Related Gastric Lesions in a High-Risk Population of Gastric  
16 Cancer. *Frontiers in cellular and infection microbiology* 2018;8:202.
- 17  
18 10. Dias-Jácome E, Libânio D, Borges-Canha M, et al. Gastric microbiota and  
19 carcinogenesis: the role of non-*Helicobacter pylori* bacteria - A systematic review.  
20 *Revista espanola de enfermedades digestivas : organo oficial de la Sociedad Espanola*  
21 *de Patologia Digestiva* 2016;108:530-40.
- 22  
23 11. Li J, Perez Perez GI. Is There a Role for the Non-*Helicobacter pylori* Bacteria in  
24 the Risk of Developing Gastric Cancer? *International journal of molecular sciences*  
25 2018;19:1-9.
- 26  
27 12. Zhang S, Shi D, Li M, et al. The relationship between gastric microbiota and gastric  
28 disease. *Scand J Gastroenterol* 2019;54:391-96.
- 29  
30 13. Nardone G, Compare D, Rocco A. A microbiota-centric view of diseases of the  
31 upper gastrointestinal tract. *Lancet Gastroenterol Hepatol* 2017;2:298-312.
- 32  
33 14. Arumugam M, Raes J, Pelletier E, et al. Enterotypes of the human gut microbiome.  
34 *Nature* 2011;473:174-80.
- 35  
36 15. Shamseer L, Moher D, Clarke M, et al. Preferred reporting items for systematic  
37 review and meta-analysis protocols (PRISMA-P) 2015: elaboration and explanation.  
38 *BMJ (Clinical research ed)* 2015;350:g7647.
- 39  
40 16. Dixon MF, Genta RM, Yardley JH, et al. Classification and grading of gastritis. The  
41 updated Sydney System. International Workshop on the Histopathology of Gastritis,  
42 Houston 1994. *The American journal of surgical pathology* 1996;20:1161-81.
- 43  
44 17. Dixon MF. Gastrointestinal epithelial neoplasia: Vienna revisited. *Gut*  
45  
46  
47  
48  
49  
50  
51  
52  
53  
54  
55  
56  
57  
58  
59  
60

2002;51:130-1.

18. Wells GA, Shea B, O'Connell D. The Newcastle-Ottawa Scale (NOS) for assessing the quality of nonrandomised studies in meta-analyses 2015. Available from: [http://www.ohri.ca/programs/clinical\\_epidemiology/nosgen.pdf](http://www.ohri.ca/programs/clinical_epidemiology/nosgen.pdf) (accessed 27 Jan 2021).

19. Wan X, Wang W, Liu J, et al. Estimating the sample mean and standard deviation from the sample size, median, range and/or interquartile range. *BMC medical research methodology* 2014;14:135.

20. Higgins JP, Thompson SG. Quantifying heterogeneity in a meta-analysis. *Statistics in medicine* 2002;21:1539-58.

21. Higgins JP, Thompson SG, Deeks JJ, et al. Measuring inconsistency in meta-analyses. *Bmj* 2003;327:557-60.

22. Nie S, Yuan Y. The Role of Gastric Mucosal Immunity in Gastric Diseases. *Journal of immunology research* 2020;2020:7927054.

**Authors' contributions:** YYY is the guarantor of this systematic review, initiated this research and designed the systematic review protocol. RYJ, XYZ and YZZ contributed to the design and revise of the systematic review protocol. RYJ, XYZ and XYC completed the pilot literature search and will conduct the formal selection of studies, data extraction, evaluation of risk of bias and quantitative synthesis. RYJ, XYZ and YYY drafted the manuscript. All the authors will involve in result interpretation. All the authors contributed to the review and revision of the manuscript and approved the publication.

**Funding statement:** This work was supported by Peking Union Medical College Hospital Youth Program (grant number punch201911356). The sponsor has not been

1  
2  
3  
4 involved in study design, data collection, data analysis and result interpretation.  
5  
6  
7  
8

9 **Competing interests:** None declared.  
10  
11  
12  
13

14 **Patient consent for publication:** Not required.  
15  
16  
17  
18

19 **Ethics approval:** Ethics approval for this study is not required since the whole study  
20 is based exclusively on published documents without involvement of individual data.  
21  
22  
23  
24  
25  
26

27 **Word Count:** 2000  
28  
29  
30  
31  
32  
33  
34  
35  
36  
37  
38  
39  
40  
41  
42  
43  
44  
45  
46  
47  
48  
49  
50  
51  
52  
53  
54  
55  
56  
57  
58  
59  
60

**PRISMA-P (Preferred Reporting Items for Systematic review and Meta-Analysis Protocols) 2015 checklist: recommended items to address in a systematic review protocol\***

| Section and topic                 | Item No | Checklist item                                                                                                                                                                                                                | Present in review Y/N | Page and Line                    |
|-----------------------------------|---------|-------------------------------------------------------------------------------------------------------------------------------------------------------------------------------------------------------------------------------|-----------------------|----------------------------------|
| <b>ADMINISTRATIVE INFORMATION</b> |         |                                                                                                                                                                                                                               |                       |                                  |
| Title:                            |         |                                                                                                                                                                                                                               |                       |                                  |
| Identification                    | 1a      | Identify the report as a protocol of a systematic review                                                                                                                                                                      | Yes                   | Page 1 Line 3                    |
| Update                            | 1b      | If the protocol is for an update of a previous systematic review, identify as such                                                                                                                                            | No                    | /                                |
| Registration                      | 2       | If registered, provide the name of the registry (such as PROSPERO) and registration number                                                                                                                                    | Yes                   | Page 3 Line 1                    |
| Authors:                          |         |                                                                                                                                                                                                                               |                       |                                  |
| Contact                           | 3a      | Provide name, institutional affiliation, e-mail address of all protocol authors; provide physical mailing address of corresponding author                                                                                     | Yes                   | Page 1 Line 4-17                 |
| Contributions                     | 3b      | Describe contributions of protocol authors and identify the guarantor of the review                                                                                                                                           | Yes                   | Page 15 Line 16-23               |
| Amendments                        | 4       | If the protocol represents an amendment of a previously completed or published protocol, identify as such and list changes; otherwise, state plan for documenting important protocol amendments                               | No                    | /                                |
| Support:                          |         |                                                                                                                                                                                                                               |                       |                                  |
| Sources                           | 5a      | Indicate sources of financial or other support for the review                                                                                                                                                                 | Yes                   | Page 15 Line 25-26               |
| Sponsor                           | 5b      | Provide name for the review funder and/or sponsor                                                                                                                                                                             | Yes                   | Page 15 Line 25-26               |
| Role of sponsor or funder         | 5c      | Describe roles of funder(s), sponsor(s), and/or institution(s), if any, in developing the protocol                                                                                                                            | Yes                   | Page 16 Line 1                   |
| <b>INTRODUCTION</b>               |         |                                                                                                                                                                                                                               |                       |                                  |
| Rationale                         | 6       | Describe the rationale for the review in the context of what is already known                                                                                                                                                 | Yes                   | Page 4 Line 3-<br>Page 5 Line 11 |
| Objectives                        | 7       | Provide an explicit statement of the question(s) the review will address with reference to participants, interventions, comparators, and outcomes (PICO)                                                                      | Yes                   | Page 5 Line 13-16                |
| <b>METHODS</b>                    |         |                                                                                                                                                                                                                               |                       |                                  |
| Eligibility criteria              | 8       | Specify the study characteristics (such as PICO, study design, setting, time frame) and report characteristics (such as years considered, language, publication status) to be used as criteria for eligibility for the review | Yes                   | Page 6 Line 4-<br>Page 7 Line 15 |

1  
2  
3  
4  
5  
6  
7  
8  
9  
10  
11  
12  
13  
14  
15  
16  
17  
18  
19  
20  
21  
22  
23  
24  
25  
26  
27  
28  
29  
30  
31  
32  
33  
34  
35  
36  
37  
38  
39  
40  
41  
42  
43  
44  
45  
46

|                                    |     |                                                                                                                                                                                                                                                     |     |                                        |
|------------------------------------|-----|-----------------------------------------------------------------------------------------------------------------------------------------------------------------------------------------------------------------------------------------------------|-----|----------------------------------------|
| Information sources                | 9   | Describe all intended information sources (such as electronic databases, contact with study authors, trial registers or other grey literature sources) with planned dates of coverage                                                               | Yes | Page 7 Line 17-<br>Page 8 Line 8       |
| Search strategy                    | 10  | Present draft of search strategy to be used for at least one electronic database, including planned limits, such that it could be repeated                                                                                                          | Yes | Page 7 Line 17-<br>Page 8 Line 8       |
| Study records:                     |     |                                                                                                                                                                                                                                                     |     |                                        |
| Data management                    | 11a | Describe the mechanism(s) that will be used to manage records and data throughout the review                                                                                                                                                        | Yes | Page 9 Line 1-4                        |
| Selection process                  | 11b | State the process that will be used for selecting studies (such as two independent reviewers) through each phase of the review (that is, screening, eligibility and inclusion in meta-analysis)                                                     | Yes | Page 8 Line 11-20                      |
| Data collection process            | 11c | Describe planned method of extracting data from reports (such as piloting forms, done independently, in duplicate), any processes for obtaining and confirming data from investigators                                                              | Yes | Page 8 Line 11-20<br>Page 9 Line 14-19 |
| Data items                         | 12  | List and define all variables for which data will be sought (such as PICO items, funding sources), any pre-planned data assumptions and simplifications                                                                                             | Yes | Page 9 Line 5-13                       |
| Outcomes and prioritization        | 13  | List and define all outcomes for which data will be sought, including prioritization of main and additional outcomes, with rationale                                                                                                                | Yes | Page 7 Line 7-11                       |
| Risk of bias in individual studies | 14  | Describe anticipated methods for assessing risk of bias of individual studies, including whether this will be done at the outcome or study level, or both; state how this information will be used in data synthesis                                | Yes | Page 9 Line 21-<br>Page 10 Line 14     |
| Data synthesis                     | 15a | Describe criteria under which study data will be quantitatively synthesised                                                                                                                                                                         | Yes | Page 10 Line 17-21                     |
|                                    | 15b | If data are appropriate for quantitative synthesis, describe planned summary measures, methods of handling data and methods of combining data from studies, including any planned exploration of consistency (such as I <sup>2</sup> , Kendall's τ) | Yes | Page 10 Line 22-<br>Page 11 Line 14    |
|                                    | 15c | Describe any proposed additional analyses (such as sensitivity or subgroup analyses, meta-regression)                                                                                                                                               | Yes | Page 11 Line 17-20                     |
|                                    | 15d | If quantitative synthesis is not appropriate, describe the type of summary planned                                                                                                                                                                  | Yes | Page 10 Line 17-21                     |
| Meta-bias(es)                      | 16  | Specify any planned assessment of meta-bias(es) (such as publication bias across studies, selective reporting within studies)                                                                                                                       | Yes | Page 11 Line 14-16                     |
| Confidence in cumulative evidence  | 17  | Describe how the strength of the body of evidence will be assessed (such as GRADE)                                                                                                                                                                  | No  | /                                      |

**\* It is strongly recommended that this checklist be read in conjunction with the PRISMA-P Explanation and Elaboration (cite when available) for important clarification on the items. Amendments to a review protocol should be tracked and dated. The copyright for PRISMA-P (including checklist) is held by the PRISMA-P Group and is distributed under a Creative Commons Attribution Licence 4.0.**

1  
2  
3 *From: Shamseer L, Moher D, Clarke M, Ghersi D, Liberati A, Petticrew M, Shekelle P, Stewart L, PRISMA-P Group. Preferred reporting items for systematic review and*  
4 *meta-analysis protocols (PRISMA-P) 2015: elaboration and explanation. BMJ. 2015 Jan 2;349(jan02 1):g7647.*  
5  
6  
7  
8  
9  
10  
11  
12  
13  
14  
15  
16  
17  
18  
19  
20  
21  
22  
23  
24  
25  
26  
27  
28  
29  
30  
31  
32  
33  
34  
35  
36  
37  
38  
39  
40  
41  
42  
43  
44  
45  
46

For peer review only



## NEWCASTLE - OTTAWA QUALITY ASSESSMENT SCALE CASE CONTROL STUDIES

Note: A study can be awarded a maximum of one star for each numbered item within the Selection and Exposure categories. A maximum of two stars can be given for Comparability.

### Selection

1) Is the case definition adequate?

- a) yes, with both clinical and histological evaluations \*
- b) yes, eg record linkage or based on self-reports
- c) no description

2) Representativeness of the cases

- a) consecutive or obviously representative series of cases \*
- b) potential for selection biases or not stated

3) Selection of controls

- a) community controls \*
- b) hospital controls
- c) no description

4) Definition of controls

- a) yes, with subdivision into normal mucosa, non-atrophic gastritis, atrophic gastritis, intestinal metaplasia and intraepithelial neoplasia \*
- b) yes, without further subdivision
- c) no description

5) Does the study have adequate exclusion criteria

- a) yes, have clear exclusion criteria, like history of surgery, history of taking antibiotics, prebiotics, probiotics, proton pump inhibitors (PPIs), chemotherapeutic drugs and any other drugs affecting gastric microbiota within the last month \*
- b) no description

6) Study size

- a)  $\geq 50$  participants in each group \*
- b)  $< 50$  participants in each group

### Comparability

1) Comparability of cases and controls on the basis of the design or analysis

- a) study controls for *H.pylori* infection status \*
- b) study controls for age, sex, country or region, race/ethnicity \*

### Exposure

1) Ascertainment of the method

- a) detailed description of experimental procedures \*

- 1  
2  
3 b) description of quality control ✱  
4 c) no description  
5  
6 2) Same method of ascertainment for cases and controls  
7 a) yes ✱  
8 b) no  
9  
10 3) Non-response rate  
11 a) same rate for both groups ✱  
12 b) non respondents described  
13 c) rate different and no designation  
14  
15

16  
17 **NEWCASTLE - OTTAWA QUALITY ASSESSMENT SCALE**  
18 **COHORT STUDIES**  
19

20 Note: A study can be awarded a maximum of one star for each numbered item within the Selection and  
21 Outcome categories. A maximum of two stars can be given for Comparability  
22  
23

24 **Selection**  
25

- 26 1) Representativeness of the exposed cohort  
27 a) truly representative of the gastric cancer population ✱  
28 b) somewhat representative of the gastric cancer population ✱  
29 c) selected group of users (eg, nurses, volunteers)  
30 d) no description  
31  
32 2) Selection of the non-exposed cohort  
33 a) drawn from the same community as the exposed cohort, with subdivision into normal mucosa,  
34 non-atrophic gastritis, atrophic gastritis, intestinal metaplasia and intraepithelial neoplasia ✱  
35 b) drawn from the same community, without further subdivision  
36 c) drawn from a different source  
37 d) no description  
38  
39 3) Ascertainment of the method  
40 a) detailed description of experimental procedures ✱  
41 b) description of quality control ✱  
42 c) no description  
43  
44 4) Demonstration that outcome of interest was not present at start of study  
45 a) yes ✱  
46 b) no  
47  
48 5) Does the study have adequate exclusion criteria  
49 a) yes, have clear exclusion criteria, like history of surgery, history of taking antibiotics, prebiotics,  
50 probiotics, proton pump inhibitors (PPIs), chemotherapeutic drugs and any other drugs affecting gastric  
51 microbiota within the last month ✱  
52 b) no description  
53  
54 6) Study size  
55  
56  
57  
58  
59  
60

- 1
- 2
- 3 a)  $\geq 50$  participants in each group \*
- 4 b)  $< 50$  participants in each group
- 5
- 6

## 7 **Comparability**

### 8 1) Comparability of cohorts on the basis of the design or analysis

- 9 a) study controls for *H.pylori* infection status \*
- 10 b) study controls for age, sex, country or region, race/ethnicity \*
- 11
- 12
- 13

## 14 **Outcome**

### 15 1) Study design

- 16 a) prospective \*
- 17 b) retrospective
- 18
- 19

### 20 2) Assessment of outcome

- 21 a) independent blind assessment \*
- 22 b) record linkage \*
- 23 c) self-report
- 24 d) no description
- 25

### 26 3) Adequacy of follow up of cohorts

- 27 a) complete follow up - all subjects accounted for \*
- 28 b) subjects lost to follow up unlikely to introduce bias - small number lost -  $\geq 90$  % (select an
- 29 adequate %) follow up, or description provided of those lost) \*
- 30 c) follow up rate  $< 90$ % (select an adequate %) and no description of those lost
- 31 d) no statement
- 32
- 33
- 34
- 35
- 36
- 37
- 38
- 39
- 40
- 41
- 42
- 43
- 44
- 45
- 46
- 47
- 48
- 49
- 50
- 51
- 52
- 53
- 54
- 55
- 56
- 57
- 58
- 59
- 60
